# Supplementary material
Source: PubMed Central journal article supplement (PMC2583345)

## **Supplemental Table and Figure Legend**

**Table S1. List of genes altered in Notch1-deficient proximal hair bulbs in GO categories of cell growth, cycle, proliferation, and programmed cell death.**

622 genes differentially regulated in Notch1-deficient proximal bulbs were classified by GO term. “emN1 vs anN1 (1)” and “emN1 vs. anN1 (2)” indicate two different microarray experiments. Validated genes by qRT-PCR were marked as “√” and the genes with no significant change as “NC”.

**Table S2. Altered expression of melanocyte signature genes in Notch1-deficient hair bulbs.**

**Figure S1. p53 does not contribute to the Notch1-deficient phenotype in skin.**

(A) Histological (H&E staining) and stereoscopic view of the genotypes specified. Note that p53 loss did not rescue Notch1-deficient follicular phenotype. Skin stripes for stereoscopic views were prepared as described in Materials and Methods. Scale Bars 200 $\mu$ M.

**Figure S2. mRNA expression patterns of TGF $\beta$  and IGF signaling components.**

TGF $\beta$ 1 is expressed in hair matrix while TGF $\beta$ 2 only in proximal hair matrix. TGF $\beta$  receptors are found in matrix as well as dermal papilla (Arrows). IGFBP2 and 3 are found in dermal fibroblasts and epidermal

basal keratinocytes, respectively. Scale Bars 50 $\mu$ M

**Figure S3. TGF $\beta$  signaling in epithelial cells do not participate in Notch1-deficient phenotype.**

(A) Histological (H&E staining) and stereoscopic view of the genotypes specified. Note that no observable difference between the presence and absence of TGF $\beta$ R2. Scale Bars 200 $\mu$ M. (B) Semi-quantitative genomic DNA PCR of the plucked hairs from wild-type and embryo-deleted *Msx2-Cre;Notch1<sup>flox/flox</sup>;Tgfr2<sup>flox/flox</sup>* (emN1;Tgfr2<sup>-/-</sup>). *Nrarp* primer sets were used as a positive control. Note the absence of Tgfr2 floxed allele in emN1;Tgfr2<sup>-/-</sup> hairs.

**Figure S4. Cell non-autonomous role of Notch1 in maintaining melanocyte population in hair follicles.**

Immunohistochemical staining of wild-type, *Msx2Cre;Rosa26R/+* (albino), *Msx2Cre;Notch1<sup>flox/flox</sup>;Rosa26R/+* with Dct-1 (green) and LacZ (red) . Nuclei were stained with DAPI. Note that melanocytes (Dct-1-positive) do not show LacZ staining and that the number of melanocytes in Notch1-deficient hair follicles is reduced. Scale bar 50 $\mu$ M.

**Figure S5. Igfbp3 mRNA expression in the follicles of P9 emN1 and P16 wild-type**

Non-radioactive mRNA in situ hybridization with Igfbp3 probe on P9 Notch1-deficient mouse skin and

on P16 wild-type. (c) and (d) are magnified view of the follicles in (a) and (b), respectively. Note that P9 emN1 sections ((a) and (c)) were developed for 2 days while P16 wild-types for 3 hours. Scale bars, (a) and (b), 200uM; (c) and (d), 50uM.

**Figure S6. Confirmation of Notch1 deficiency in IGF1 rescued hair follicles.**

Immunohistochemical analyses with full-length Notch1 (1:50, rabbit, Abcam ab27526) and cleaved Notch1 (V1744, 1:100, rabbit, Cell Signaling, #2421) antibodies. Note the absence of Notch1 and V1744 immunoreactivity in emN1 and emN1;Ivl-IGF1 follicles. Scale bars, 50uM.

**Table S1**

| Probe Set ID                               | Gene Symbol   | Gene Title                                                   | emN1 vs<br>anN1 (1) | emN1 vs<br>anN1 (2) | qRT-PCR<br>validation |
|--------------------------------------------|---------------|--------------------------------------------------------------|---------------------|---------------------|-----------------------|
| <b>Cell Cycle / Growth / Proliferation</b> |               |                                                              |                     |                     |                       |
| 1456022_at                                 | B230339E18Rik | RIKEN cDNA B230339E18 gene                                   | -2.32               | -1.74               |                       |
| 1418971_x_at                               | Bcl10         | B-cell leukemia/lymphoma 10                                  | 1.56                | 1.62                |                       |
| 1418970_a_at                               | Bcl10         | B-cell leukemia/lymphoma 10                                  | 1.62                | 1.62                |                       |
| 1422477_at                                 | Cables1       | Cdk5 and Abl enzyme substrate 1                              | 2.5                 | 1.63                |                       |
| 1441938_x_at                               | Cables1       | Cdk5 and Abl enzyme substrate 1                              | 2.01                | 1.92                |                       |
| 1455869_at                                 | Camk2b        | Calcium/calmodulin-dependent<br>kinase II, beta              | 2.56                | 2.3                 |                       |
| 1449145_a_at                               | Cav1          | caveolin, caveolae protein 1                                 | 2.98                | 3.23                |                       |
| 1417327_at                                 | Cav2          | caveolin 2                                                   | 3.31                | 2.29                |                       |
| 1417419_at                                 | Cend1         | cyclin D1                                                    | -2.37               | -2.32               | NC                    |
| 1448698_at                                 | Cend1         | cyclin D1                                                    | -1.5                | -1.79               | NC                    |
| 1417649_at                                 | Cdkn1c        | cyclin-dependent kinase inhibitor 1C (P57)                   | 2.43                | 2.22                | √                     |
| 1449152_at                                 | Cdkn2b        | cyclin-dependent kinase inhibitor 2B (p15,<br>inhibits CDK4) | 1.72                | 1.83                | √                     |
| 1450944_at                                 | Cspg4         | chondroitin sulfate proteoglycan 4                           | 3.53                | 1.94                |                       |
| 1423341_at                                 | Cspg4         | chondroitin sulfate proteoglycan 4                           | 4.9                 | 3.12                |                       |
| 1448823_at                                 | Cxcl12        | chemokine (C-X-C motif) ligand 12                            | 6.22                | 4.19                |                       |
| 1421117_at                                 | Dst           | dystonin                                                     | 2.96                | 2.39                |                       |
| 1419431_at                                 | Ereg          | epiregulin                                                   | 2.87                | 2.88                |                       |
| 1416268_at                                 | Ets2          | E26 avian leukemia oncogene 2, 3' domain                     | 1.78                | 1.78                |                       |
| 1438883_at                                 | Fgf5          | fibroblast growth factor 5                                   | -1.56               | -2.57               |                       |
| 1416855_at                                 | Gas1          | growth arrest specific 1                                     | 2.3                 | 2.78                |                       |
| 1417399_at                                 | Gas6          | growth arrest specific 6                                     | 2.52                | 2.1                 |                       |
| 1459211_at                                 | Gli2          | GLI-Kruppel family member GLI2                               | 1.58                | 1.6                 |                       |
| 1446086_s_at                               | Gli2          | GLI-Kruppel family member GLI2                               | 2.08                | 1.61                |                       |
| 1419292_at                                 | Htra3         | serine protease HTRA3                                        | 2.33                | 4.63                |                       |
| 1454159_a_at                               | Igfbp2        | insulin-like growth factor binding protein 2                 | 5.8                 | 7.05                | √                     |
| 1458268_s_at                               | Igfbp3        | insulin-like growth factor binding protein 3                 | 8.03                | 4.05                | √                     |
| 1423062_at                                 | Igfbp3        | insulin-like growth factor binding protein 3                 | 6.4                 | 5.98                | √                     |
| 1437406_x_at                               | Igfbp4        | insulin-like growth factor binding protein 4                 | 1.51                | 1.75                | √                     |

|                              |               |                                                                                  |       |       |   |
|------------------------------|---------------|----------------------------------------------------------------------------------|-------|-------|---|
| 1423757_x_at                 | Igfbp4        | insulin-like growth factor binding protein 4                                     | 1.74  | 1.85  | √ |
| 1423756_s_at                 | Igfbp4        | insulin-like growth factor binding protein 4                                     | 1.89  | 1.89  | √ |
| 1423584_at                   | Igfbp7        | insulin-like growth factor binding protein 7                                     | 2.58  | 1.96  |   |
| 1421066_at                   | Jak2          | Janus kinase 2                                                                   | 1.63  | 1.51  |   |
| 1421317_x_at                 | Myb           | myeloblastosis oncogene                                                          | 1.86  | 2.37  |   |
| 1450194_a_at                 | Myb           | myeloblastosis oncogene                                                          | 2.22  | 2.56  |   |
| 1422818_at                   | Nedd9         | neural precursor cell expressed,<br>developmentally down-regulated gene 9        | 2.09  | 1.53  |   |
| 1438157_s_at                 | Nfkbia        | nuclear factor of kappa light chain gene<br>enhancer in B-cells inhibitor, alpha | 1.5   | 1.8   |   |
| 1448306_at                   | Nfkbia        | nuclear factor of kappa light chain gene<br>enhancer in B-cells inhibitor, alpha | 1.89  | 2.25  |   |
| 1421917_at                   | Pdgfra        | platelet derived growth factor receptor,<br>alpha polypeptide                    | 1.56  | 1.84  |   |
| 1417133_at                   | Pmp22         | peripheral myelin protein                                                        | 2.11  | 1.99  |   |
| 1438251_x_at                 | Prss11        | protease, serine, 11 (Igf binding)                                               | 2.29  | 2.35  |   |
| 1416749_at                   | Prss11        | protease, serine, 11 (Igf binding)                                               | 2.47  | 2.55  |   |
| 1447830_s_at                 | Rgs2          | regulator of G-protein signaling 2                                               | 5.19  | 3.54  |   |
| 1419248_at                   | Rgs2          | regulator of G-protein signaling 2                                               | 6.32  | 3.63  |   |
| 1419247_at                   | Rgs2          | regulator of G-protein signaling 2                                               | 5.96  | 3.84  |   |
| 1418448_at                   | Rras          | Harvey rat sarcoma oncogene, subgroup R                                          | 2.1   | 1.95  |   |
| 1456212_x_at                 | Socs3         | suppressor of cytokine signaling 3                                               | 6.63  | 2.13  |   |
| 1455899_x_at                 | Socs3         | suppressor of cytokine signaling 3                                               | 2.73  | 2.21  |   |
| 1421943_at                   | Tgfa          | transforming growth factor alpha                                                 | 4.31  | 3.28  |   |
| 1423250_a_at                 | Tgfb2         | transforming growth factor, beta 2                                               | 3.45  | 1.83  | √ |
| 1450923_at                   | Tgfb2         | transforming growth factor, beta 2                                               | 3.36  | 2.23  | √ |
| 1450922_a_at                 | Tgfb2         | transforming growth factor, beta 2                                               | 3.15  | 2.86  | √ |
| 1426397_at                   | Tgfbr2        | transforming growth factor, beta receptor II                                     | 2.23  | 2.16  | √ |
| 1460302_at                   | Thbs1         | Thrombospondin 1                                                                 | 3.46  | 3.06  |   |
| <b>Programmed Cell Death</b> |               |                                                                                  |       |       |   |
| 1456022_at                   | B230339E18Rik | RIKEN cDNA B230339E18 gene                                                       | -2.32 | -1.74 |   |
| 1418971_x_at                 | Bcl10         | B-cell leukemia/lymphoma 10                                                      | 1.56  | 1.62  |   |
| 1418970_a_at                 | Bcl10         | B-cell leukemia/lymphoma 10                                                      | 1.62  | 1.62  |   |
| 1421392_a_at                 | Birc3         | baculoviral IAP repeat-containing 3                                              | 2.17  | 1.77  |   |
| 1454880_s_at                 | Bmf           | Bcl2 modifying factor                                                            | 1.9   | 1.69  |   |

|               |           |                                                               |       |       |   |
|---------------|-----------|---------------------------------------------------------------|-------|-------|---|
| 1417040_a_at  | Bok       | Bcl-2-related ovarian killer protein                          | 1.57  | 1.71  |   |
| 1416855_at    | Gas1      | growth arrest specific 1                                      | 2.3   | 2.78  |   |
| 1435040_at    | Irak3     | interleukin-1 receptor-associated kinase 3                    | 2.56  | 2.79  |   |
| 1421066_at    | Jak2      | Janus kinase 2                                                | 1.63  | 1.51  |   |
| 1420640_at    | Jmy       | junction-mediating and regulatory protein                     | 1.53  | 1.66  |   |
| 1454974_at    | Ntn1      | netrin 1                                                      | 4.22  | 2.89  |   |
| 1423986_a_at  | Scotin    | scotin gene                                                   | 1.91  | 1.73  | √ |
| 1450036_at    | Sgk3      | serum/glucocorticoid regulated kinase 3                       | 2.11  | 1.62  |   |
| 1418011_a_at  | Sh3glb1   | SH3-domain GRB2-like B1 (endophilin)                          | 1.66  | 1.56  |   |
| 1433699_at    | Tnfaip3   | tumor necrosis factor, alpha-induced protein 3                | 1.71  | 1.59  |   |
| 1416926_at    | Trp53inp1 | transformation related protein 53 inducible nuclear protein 1 | 1.81  | 1.72  |   |
| 1452325_at    | Trp73     | transformation related protein 73                             | 4.19  | 3.28  | √ |
| <b>Others</b> |           |                                                               |       |       |   |
| 1460302_at    | Thbs1     | thrombospondin 1                                              | 4.2   | 3.65  |   |
| 1421811_at    | Thbs1     | thrombospondin 1                                              | 3.64  | 5.04  |   |
| 1415855_at    | Kitl      | Kit ligand                                                    | -3.24 | -2.63 | √ |

**Table S2**

| ProbeSet ID  | Gene Symbol   | Gene Title                                                      | emN1 vs<br>anN1 (1) | emN1_vs<br>anN1 (2) |
|--------------|---------------|-----------------------------------------------------------------|---------------------|---------------------|
| 1423989_at   | 2210010N04Rik | RIKEN cDNA 2210010N04 gene                                      | -1.78               | -3.8                |
| 1434175_s_at | 2210010N04Rik | RIKEN cDNA 2210010N04 gene                                      | -2.12               | -2.25               |
| 1416607_at   | 4931406C07Rik | RIKEN cDNA 4931406C07 gene                                      | -2.52               | -1.99               |
| 1433671_at   | A130022J15Rik | RIKEN cDNA A130022J15 gene                                      | -1.7                | -1.89               |
| 1454678_s_at | A130022J15Rik | RIKEN cDNA A130022J15 gene                                      | -1.58               | -1.82               |
| 1450380_at   | AU040950      | ependymin 2                                                     | -3.54               | -3.49               |
| 1435758_at   | B4galt6       | UDP-Gal:betaGlcNAc beta 1,4-galactosyltransferase, polypeptide6 | -1.68               | -1.75               |
| 1416673_at   | Bace2         | beta-site APP-cleaving enzyme 2                                 | -2.19               | -3.34               |
| 1424383_at   | BC003277      | cDNA sequence BC003277                                          | -1.87               | -1.71               |
| 1418476_at   | Crlf1         | cytokine receptor-like factor 1                                 | -3.46               | -3.63               |

|              |         |                                                                                   |       |       |
|--------------|---------|-----------------------------------------------------------------------------------|-------|-------|
| 1418365_at   | Ctsh    | cathepsin H                                                                       | 3.08  | 2.63  |
| 1450779_at   | Fabp7   | fatty acid binding protein 7, brain                                               | -4.48 | -3.55 |
| 1420581_at   | Gpr143  | mouse homolog of human ocular albinism 1<br>(Nettleship-Falls)                    | -5.11 | -4.18 |
| 1421040_a_at | Gsta2   | glutathione S-transferase, alpha 2 (Yc2)                                          | -7.07 | -5.76 |
| 1451055_at   | Matp    | membrane associated transporter protein                                           | -3.71 | -4    |
| 1437430_at   | Matp    | membrane associated transporter protein                                           | -2.82 | -3.27 |
| 1437540_at   | Mcoln3  | mucolipin 3                                                                       | -2.99 | -2.97 |
| 1450391_a_at | Mgll    | monoglyceride lipase                                                              | -1.73 | -1.82 |
| 1449896_at   | Mlph    | melanophilin                                                                      | -2.1  | -2.02 |
| 1419127_at   | Npy     | neuropeptide Y                                                                    | -2.21 | -2.51 |
| 1426588_at   | Ocsp    | oculospanin                                                                       | -3.09 | -3.11 |
| 1418211_at   | p       | pink-eyed dilution                                                                | -3.52 | -4.09 |
| 1418835_at   | Phlda1  | pleckstrin homology-like domain, family A,<br>member 1                            | -1.5  | -1.53 |
| 1423213_at   | Plxnc1  | plexin C1                                                                         | -3.17 | -3.42 |
| 1450905_at   | Plxnc1  | plexin C1                                                                         | -3.19 | -2.52 |
| 1423860_at   | Ptgds   | prostaglandin D2 synthase (brain)                                                 | -2.63 | -2.83 |
| 1423859_a_at | Ptgds   | prostaglandin D2 synthase (brain)                                                 | -2.65 | -2.07 |
| 1416527_at   | Rab32   | RAB32, member RAS oncogene family                                                 | -1.85 | -1.75 |
| 1417700_at   | Rab38   | Rab38, member of RAS oncogene family                                              | -2.94 | -3.35 |
| 1448595_a_at | Rex3    | reduced expression 3                                                              | 3.79  | 4.5   |
| 1449078_at   | Siat10  | sialyltransferase 10 (alpha-2,3-sialyltransferase<br>VI)                          | -3.32 | -3.18 |
| 1418326_at   | Slc7a5  | solute carrier family 7 (cationic amino acid<br>transporter, y+ system), member 5 | -1.61 | -2.85 |
| 1451689_a_at | Sox10   | SRY-box containing gene 10                                                        | -3.12 | -3.26 |
| 1420928_at   | St6gal1 | sialyltransferase 1 (beta-galactoside alpha-2,6-<br>sialyltransferase)            | -2    | -1.69 |
| 1415845_at   | Syt4    | synaptotagmin 4                                                                   | -4.61 | -3.07 |
| 1450881_s_at | Tm7sf1  | transmembrane 7 superfamily member 1                                              | -2.83 | -2.33 |
| 1439255_s_at | Tm7sf1  | transmembrane 7 superfamily member 1                                              | -2.14 | -2.06 |
| 1422754_at   | Tmod1   | tropomodulin 1                                                                    | 2.79  | 26.42 |
| 1418935_at   | Trpm1   | transient receptor potential cation channel,<br>subfamily M, member 1             | -4.26 | -4.51 |

|              |       |                                                                      |       |       |
|--------------|-------|----------------------------------------------------------------------|-------|-------|
| 1437531_at   | Trpm1 | transient receptor potential cation channel,<br>subfamily M, member1 | -3.01 | -3.76 |
| 1448361_at   | Ttc3  | tetratricopeptide repeat domain 3                                    | -1.51 | -1.75 |
| 1448821_at   | Tyr   | tyrosinase                                                           | -3.58 | -4.39 |
| 1456095_at   | Tyr   | tyrosinase                                                           | -3.75 | -3.17 |
| 1417717_a_at | Tyr   | tyrosinase                                                           | -2.95 | -3.09 |
| 1415862_at   | Tyrp1 | tyrosinase-related protein 1                                         | -3.76 | -3.19 |
| 1415861_at   | Tyrp1 | tyrosinase-related protein 1                                         | -2.34 | -2.56 |



Fig.S1

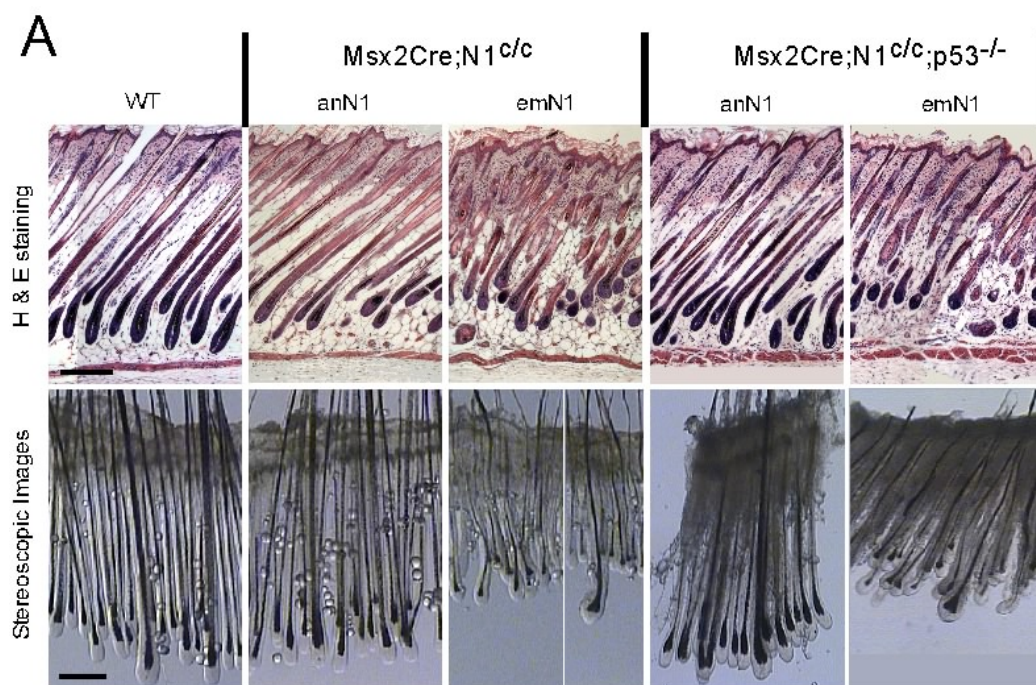

Fig S2

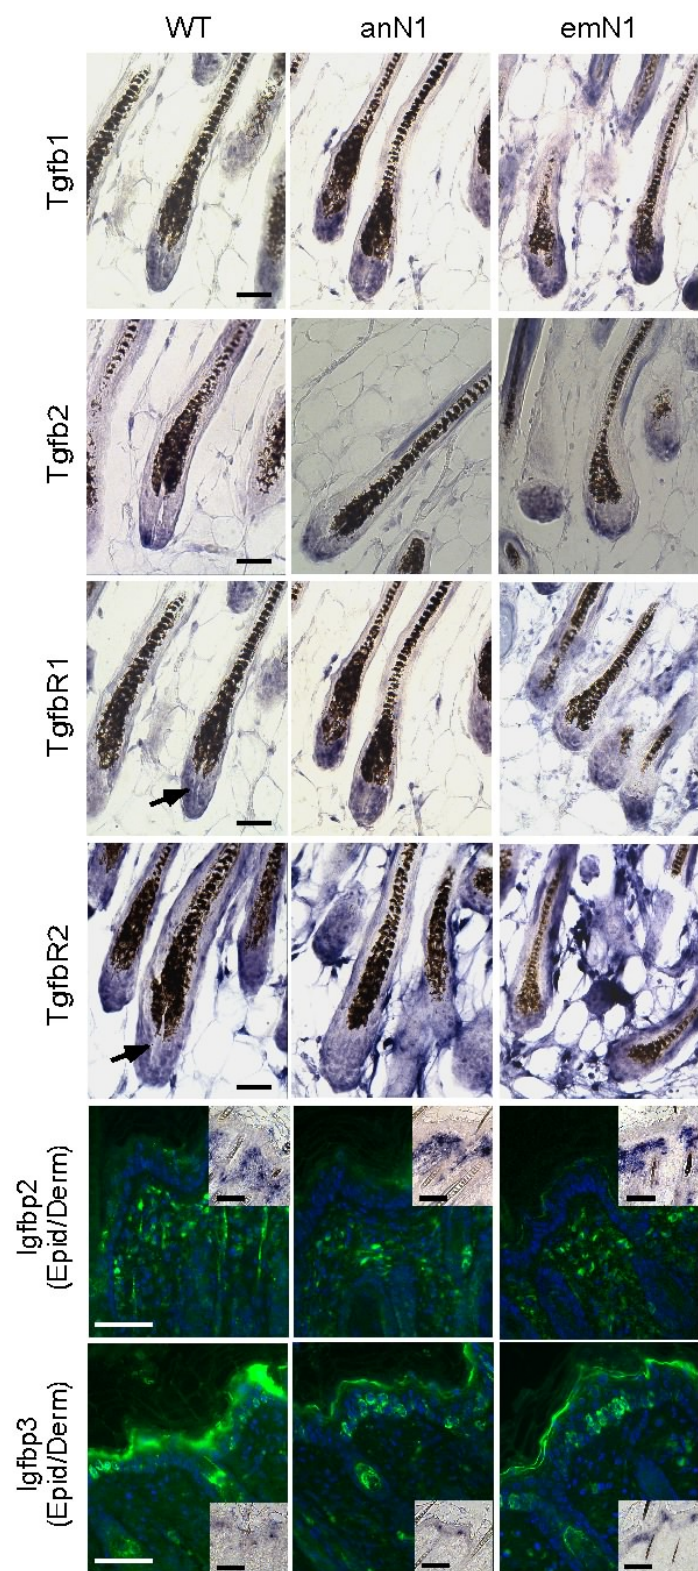

Fig. S3

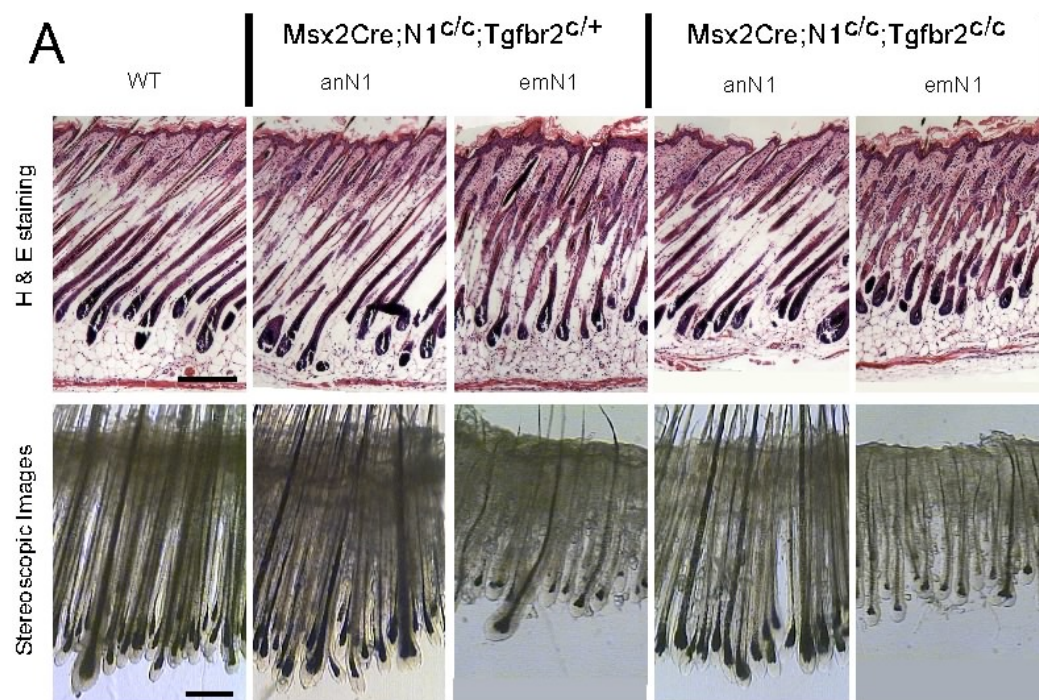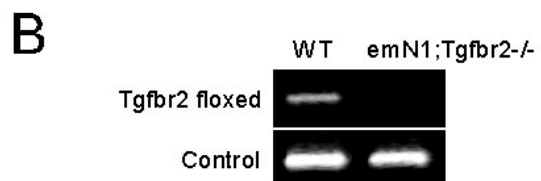



Fig S4

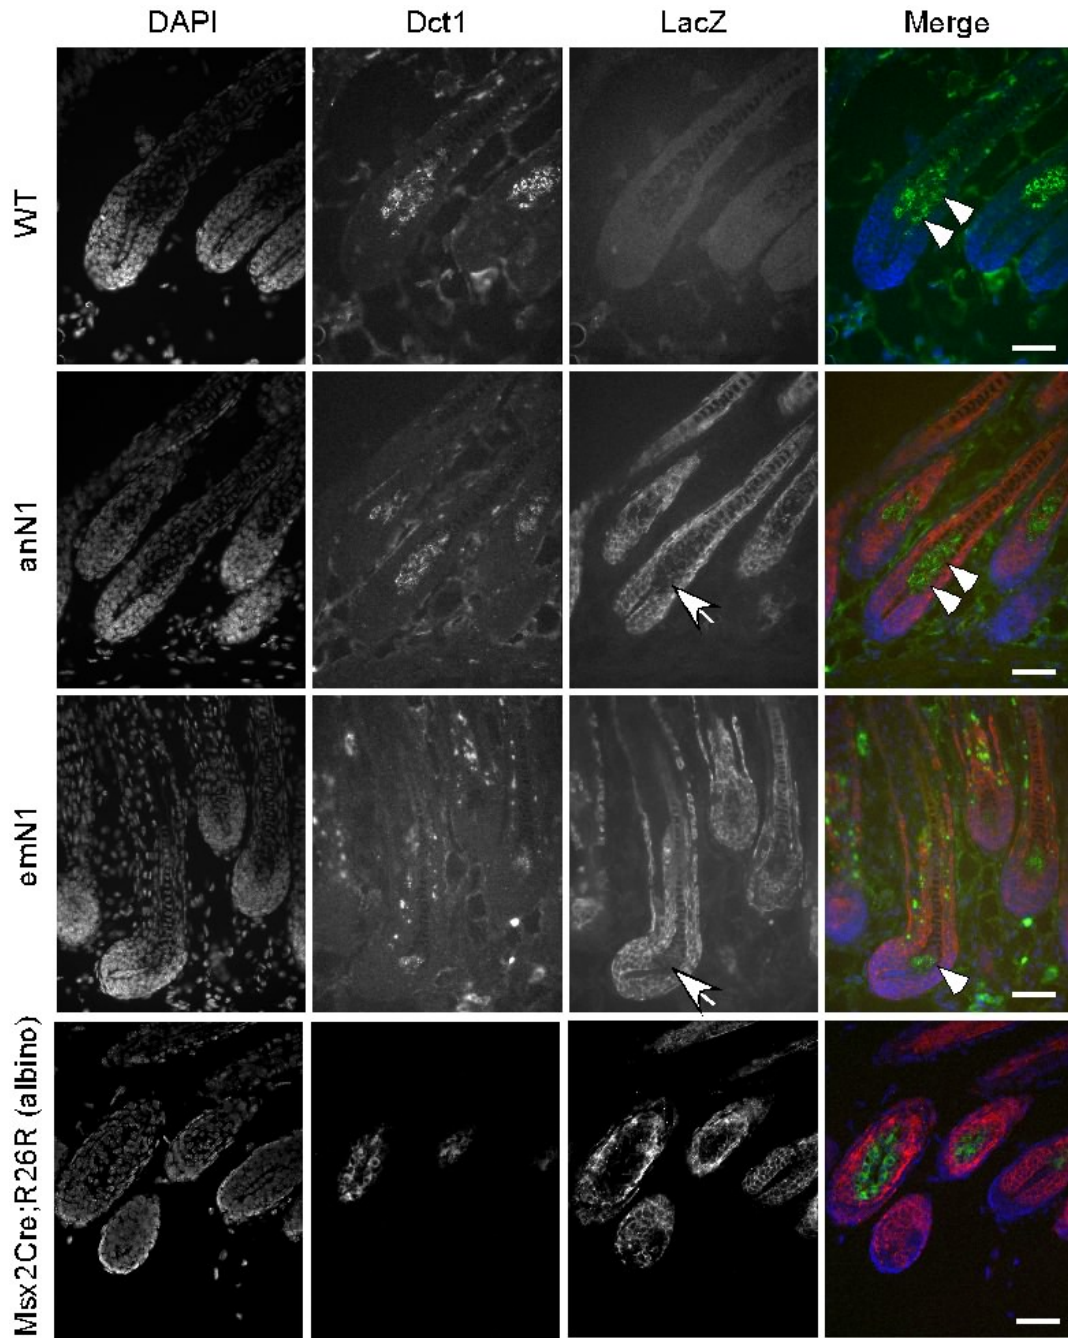

Fig. S5

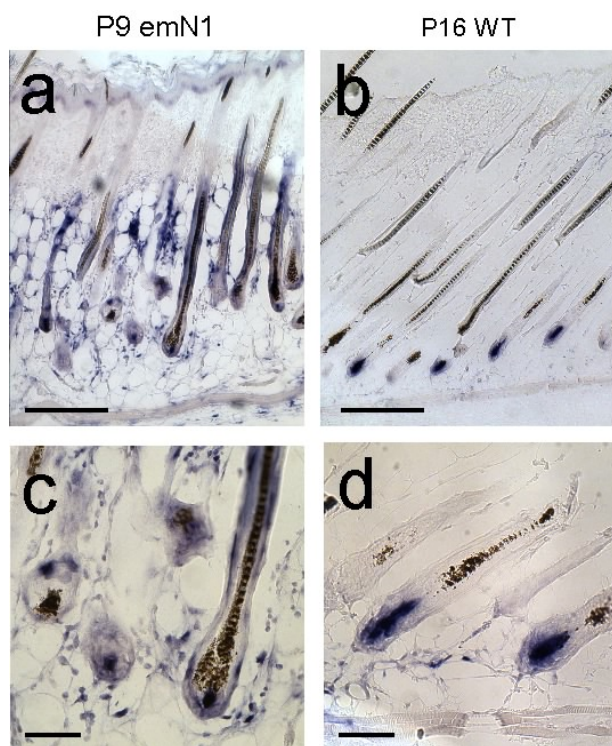

Fig. S6

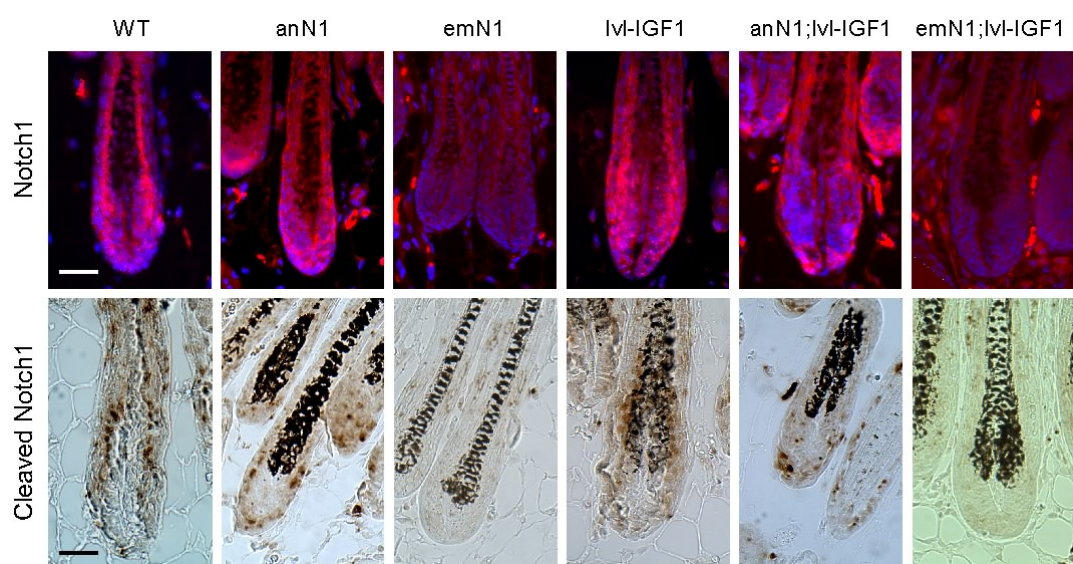

Supplement: NIHMS76669-supplement-supplement_1.pdf [file NIHMS76669-supplement-supplement_1.pdf]
